# Supplementary material for: A Highly Homogeneous Airborne Fungal Community Around a Copper Open-Pit Mine Reveals a Poor Contribution by the Local Aerosolization of Particles
Source: Preprints.org preprint supplement (doi:10.20944/preprints202404.0787.v1), 2024-04-11
Supplement: Supplementary file 1 [file supplementary]

## Sheet: SITES_METADATA
site	longitude	latitude	altitude	collectionDate	collectionTime	collectionTime2	sky	vegetation	groundType	groundImpact	road	dist_to_road_m	temperature_C	humidity_%	windSpeed_ms-1	pressure_mmHg	solarRadiation_Wm-2	UV-dose_MEDs	Al_mgKg.soil	Cu_mgKg.soil	Fe_mgKg.soil	Hg_mgKg.soil	Pb_mgKg.soil	Zn_mgKg.soil	PM2.5_ugm3	PM10_ugm3	CO2_ppm	Obs
1_01	-71.0817	-30.2615	1070	2021-09-24	14:41:00	morning	clean	scarce_bush	loamy	yes	paved	7	24.1471	32.4118	12.6176	704.112	813.647	0.208824	5203.92	409.461	82255.7	29	6.26726	40.3194	7.34247	8.32877	390.589
1_02	-71.0805	-30.2748	1127	2021-09-24	16:40:00	late_afternoon	clean	scarce_bush	stony	no	dirt	20	22.85	37.5	10.8938	698.481	494.688	0.075625	5909.82	310.72	81102.1	240	10.2211	111.001	8.16327	9.08163	391.224
1_03	-70.9019	-30.3134	1045	2021-09-25	10:00:00	morning	fog	bush	sandy	no	dirt	15	8.22667	84.4667	6.31333	708.847	160.067	0.0373333	4918.74	69.9445	87171.4	848	20.5719	80.4361	16.678	18.6441	322.424
1_04	-70.9511	-30.3005	790	2021-09-25	12:08:00	noon	clean	absent	loamy	no	dirt	40	14.6667	64.4667	4.90667	731.547	871	0.239333	4797.83	92.1451	71567.4	614	39.7899	95.077	11.3438	12.75	369.828
1_05	-70.953	-30.2662	882	2021-09-25	14:05:00	afternoon	clean	scarce_bush	loamy	no	dirt	7	23.2	27.9375	7.65	722.144	843.938	0.231875	5308.61	112.688	62642	158	16.3909	75.808	4.04286	4.7	387.1
1_06	-70.9542	-30.2417	1106	2021-09-25	16:12:00	late_afternoon	clean	bush	loamy	no	dirt	50	23.2429	30.0714	11.5286	702.243	534.5	0.101429	3880.86	90.9432	67695.2	114	9.27992	156.088	2	2.28571	390.429
1_07	-70.9371	-30.1796	861	2021-09-26	09:50:00	morning	clean	scarce_bush	loamy	no	dirt	5	21.2	21.3077	2.83077	722.354	531.538	0.108462	10350.8	95.7116	80106.6	111	7.97597	149.151	0.418182	0.563636	381.727
1_08	-70.9767	-30.1614	572	2021-09-26	12:16:00	noon	clean	bush_tree	sandy	no	dirt	17	28.4933	16.6	11.08	746.893	902.6	0.252667	5655.12	143.86	85452.9	209	18.2358	242.739	0.8	1.01538	423.292
1_09	-70.9865	-30.1455	544	2021-09-26	14:15:00	afternoon	clean	absent	stony	no	dirt	6	30.0583	18.5833	18.2333	747.358	869.25	0.235833	6446.49	103.236	84411.3	238	18.7701	172.685	1.88679	2.35849	440.057
1_10	-71.005	-30.1058	529	2021-09-26	16:30:00	late_afternoon	clean	scarce_bush	loamy	no	dirt	10	21.9857	43.7857	14.6143	748.614	413.357	0.0742857	4345.12	132.872	68566	360	7.93266	69.8074	6.81667	8.16667	410.6
1_12	-70.98	-30.2459	1294	2021-10-10	09:34:00	morning	clean	scarce_bush	loamy	no	dirt	20	14.3412	29.2941	12.0471	688.488	782.471	0.138824	5415.97	112.403	63833.9	228	20.6073	149.309	0	0.188406	335.058
1_13	-71.0091	-30.2509	1339	2021-10-10	12:00:00	noon	clean	scarce_bush	loamy	no	dirt	500	17.7941	14.4118	12.8	684.565	1021.41	0.291176	15568.6	83.132	77050.9	185	12.4698	51.9575	0	0.0142857	359.271
1_14	-71.0322	-30.2707	1325	2021-10-10	14:26:00	afternoon	clean	scarce_bush	loamy	no	dirt	30	19.3167	19.6667	13.5667	685.233	867.917	0.215833	3368.1	129.759	49786.1	NA	24.4474	63.9393	0	0.0461538	370.754
1_15	-71.0533	-30.2584	1255	2021-10-10	16:54:00	late_afternoon	clean	scarce_bush	loamy	yes	dirt	100	19.5706	29.4706	10.8176	690.453	401.941	0.06	3678.85	155.949	82390	197	21.9876	110.142	0.0571429	0.342857	362.471
1_17	-70.977	-30.3598	700	2021-10-11	11:34:00	noon	clean	bush_cactus	loamy	no	dirt	6	27.3941	15.6471	10.7118	735.076	971.176	0.278235	8536.93	126.719	58091.3	241	38.0724	179.565	0.0144928	0.130435	417.71
1_18	-70.996	-30.3811	617	2021-10-11	14:03:00	afternoon	clean	scarce_bush	loamy	no	dirt	15	26.7867	21.6667	17.48	741.247	901.333	0.254667	12698	153.022	62945.2	162	84.8985	357.597	2.61017	3.72881	406.559
1_19	-71.0198	-30.3622	760	2021-10-11	16:36:00	late_afternoon	partial	scarce_bush	stony	no	paved	150	23.1176	26.3529	15.3471	729.912	430.353	0.0717647	3557.31	134.207	93087.8	180	33.7601	8.96101	2.54412	2.97059	425.588
1_20	-71.0504	-30.2108	1087	2021-10-12	08:58:00	morning	fog	bush	loamy	yes	paved	40	8.14706	80.1176	3.95294	705.259	520.529	0.0923529	5312.9	160.793	24391.7	571	19.9718	44.6308	10.1467	10.8933	333.013
1_21	-71.0352	-30.1847	1281	2021-10-12	11:26:00	noon	fog	bush	sandy	no	dirt	15	8.49375	80.375	5.4	687.775	731.875	0.219375	5260.78	132.377	79645.8	731	24.8207	265.965	10.2714	11.2857	349.343
1_22	-71.0485	-30.1594	1132	2021-10-12	13:50:00	afternoon	partial	bush	sandy	no	dirt	12	11.4353	69.9412	13.1824	700.241	1017.88	0.296471	7080.07	104.072	105077	86	20.4963	89.053	9.18667	9.92	347.04
1_23	-71.0562	-30.1433	1091	2021-10-12	16:11:00	late_afternoon	clean	bush	loamy	no	dirt	12	13.3067	61.6	13.2067	703.087	599.533	0.105333	19239.2	108.469	93228.6	126	17.4037	124.861	6.45333	7.18667	337.947
1_24	-71.0298	-30.1215	877	2021-10-13	09:10:00	morning	clean	bush_cactus	loamy	no	dirt	12	12.0692	64	2.09231	723.054	574	0.0992308	5373.82	369.835	106541	196	17.2709	93.3024	3.33333	3.63158	356.596
1_25	-70.9944	-30.0408	407	2021-10-13	11:41:00	noon	clean	bush_cactus	loamy	no	dirt	10	19.5647	45.9412	12.9	763.853	1004.88	0.281176	4394.95	109.724	63661.6	275	20.7102	64.9185	2.86667	3.29333	387.627
1_26	-71.031	-30.0278	361	2021-10-13	14:13:00	afternoon	clean	bush	loamy	no	dirt	7	20.4267	47.7333	16.1	765.747	944.667	0.249333	6260.77	148.711	67239.9	419	14.5084	60.8546	2.57576	3.24242	383.394
1_27	-71.0569	-30.0718	496	2021-10-13	16:38:00	late_afternoon	clean	bush	sandy	no	paved	7	18.8333	50.5333	9.98667	752.94	472.4	0.07	3583.41	438.853	60025.1	129	19.6324	100.938	3.84615	4.53846	376.138
1_28	-71.0991	-30.2856	1171	2021-10-14	08:32:00	morning	clean	bush	stony	no	paved	6	11.4824	64.0588	8.21765	697.471	491.588	0.0641176	10646.7	269.426	68748.5	138	98.7027	152.468	1.66667	2.01333	297.6
1_29	-71.0501	-30.3386	1052	2021-10-14	11:04:00	noon	clean	bush	sandy	no	paved	200	15.625	48.625	8.9625	706.388	1029.81	0.2775	20959.1	233.663	45548.6	198	103.343	346.76	1.02857	1.27143	333.343
1_30	-70.9831	-30.4249	603	2021-10-14	13:53:00	afternoon	clean	cactus	stony	no	dirt	6	21.9333	33.6667	14.6333	743.042	943.75	0.239167	4954.11	123.44	63886.1	621	27.454	105.688	0.115385	0.384615	383.192
1_31	-71.144	-30.4288	495	2021-10-14	16:57:00	late_afternoon	clean	bush	loamy	no	dirt	15	20.375	32.875	14.4	753.644	419.625	0.054375	12297.5	448.757	76706.7	121	19.1518	134.869	0.0285714	0.4	374.171
1_32	-71.1392	-30.3817	623	2021-10-15	09:10:00	morning	clean	bush_cactus	loamy	no	dirt	10	14.92	45.6	6.72	745.307	808.867	0.133333	6615.69	437.463	77216.3	828	19.8471	182.965	NA	NA	NA
1_33	-71.1653	-30.3198	718	2021-10-15	11:54:00	noon	clean	bush_flower	loamy	no	dirt	35	21.2571	25.7143	9.55714	736.214	1044.79	0.285	10299.2	438.395	84821.4	145	11.2708	272.248	NA	NA	NA
1_34	-71.1762	-30.3025	805	2021-10-15	13:55:00	afternoon	partial	bush_cactus	sandy	no	dirt	8	22.1437	30.375	19.6	728.094	994.125	0.26625	4088.94	100.179	78608.6	105	12.0624	208.74	0.408451	0.859155	369.944
1_35	-71.1771	-30.28	713	2021-10-15	16:08:00	late_afternoon	partial	bush_cactus	sandy	no	dirt	10	22.2	34	15.2385	734.746	631.846	0.113077	3675.34	103.522	103827	249	14.293	165.595	2.19298	3.19298	361.316
1_36	-71.0774	-30.1037	753	2021-10-16	09:58:00	morning	clean	bush	loamy	no	paved	5	16.7571	46.7857	6.74286	734.386	855.929	0.166429	4614.28	536.861	62492.1	480	1.0031	81.452	2.81034	4.18966	371.759
1_37	-71.1122	-30.1086	921	2021-10-16	12:04:00	noon	clean	bush	sandy	yes	paved	5	20.2063	41.3125	6.9125	721.4	1013.56	0.2775	5904.86	304.297	75482.6	577	14.959	75.5822	3.42857	4.9	368.3
1_38	-71.1797	-30.1242	385	2021-10-16	14:29:00	afternoon	clean	bush_cactus	loamy	no	dirt	3	19.3133	49.7333	12.6867	768.247	898.067	0.214667	4230.45	115.886	49359.6	459	52.8603	256.576	7.63077	9.86154	386.708
2_01	-71.0816	-30.2614	1056	2022-01-04	08:36:00	morning	clean	scarce_bush	loamy	yes	paved	7	22.65	48.3571	2.05714	703.557	660.571	0.111429	7000.36	455.537	81123	465	12.4237	48.2455	NA	NA	NA
2_02	-71.0804	-30.2748	1130	2022-01-04	11:32:00	noon	clean	scarce_bush	stony	no	dirt	20	25.8368	37.4737	15.2579	697.795	1084.79	0.359474	7233.27	335.322	85200.4	157	16.1601	138.775	NA	NA	NA
2_03	-70.9011	-30.3139	1060	2022-01-11	09:22:00	morning	clean	bush	sandy	no	dirt	50	21.5529	50.7059	5.18235	705.988	602.412	0.154118	3540.82	98.6965	79770.7	117	27.2266	118.946	2.44	2.81333	342.573
2_04	-70.9506	-30.3004	783	2022-01-12	11:52:00	noon	clean	scarce_bush	loamy	no	dirt	40	27.9235	41	14.8765	727.418	1054.29	0.382353	6239.79	103.62	74267.3	131	23.0266	96.5024	3.72973	4.22973	361.041
2_05	-70.9536	-30.2511	953	2022-01-12	14:15:00	afternoon	clean	scarce_bush	loamy	no	dirt	60	28.4588	39.4706	14.5941	712.682	1039.47	0.375882	6683.8	126.733	87134.6	298	28.8029	99.0819	3.89189	4.37838	360.892	Not the same as 1_05
2_07	-70.9368	-30.1807	823	2022-01-07	09:47:00	morning	clean	bush_tree	loamy	no	dirt	30	22.6118	49.0588	6.41765	721.771	867.588	0.220588	6367.42	155.939	91593.8	1006	17.0892	202.293	3.66667	4.49333	354.453	Not the same as 1_07
2_08	-70.9766	-30.1613	556	2022-01-07	12:31:00	noon	clean	bush_tree	loamy	no	dirt	17	27.6941	39.6471	16.1	745.829	1139.29	0.393529	4312.81	257.091	82819.2	128	25.7091	279.241	5.02667	5.98667	380.72
2_09	-70.9847	-30.1396	513	2022-01-07	14:57:00	afternoon	clean	scarce_bush	loamy	no	dirt	30	28.0471	40.5882	17.7941	747.429	1013.53	0.309412	4886.19	119.035	76917.5	270	24.628	213.853	4.42667	5.08	396.813	Not the same as 1_09
2_10	-71.0052	-30.1057	534	2022-01-07	17:24:00	late_afternoon	clean	scarce_bush	loamy	no	dirt	10	22.3294	54.0588	17.0412	747.006	472	0.0817647	3941.57	67.2462	76865.4	229	15.1541	73.3078	5.44	6.42667	362.72
2_12	-70.98	-30.246	1295	2022-01-12	17:00:00	late_afternoon	clean	bush	sandy	no	dirt	20	27.1294	39.8824	5.74118	685.918	601.235	0.142353	2565.86	108.723	56162.7	173	18.4623	153.237	3.70667	4.13333	349.907
2_13	-71.0091	-30.2508	1341	2022-01-05	15:33:00	afternoon	clean	scarce_bush	loamy	no	dirt	500	25.0842	42.8947	20.3105	679.711	948.105	0.287368	4614.19	101.153	75415.8	240	10.1153	55.0272	2.23529	2.77647	369.918
2_14	-71.0322	-30.2709	1334	2022-01-05	18:02:00	late_afternoon	clean	scarce_bush	loamy	no	dirt	30	23.2706	45.6471	8.41176	680.359	326.588	0.0470588	3542.62	243.444	49047.2	239	12.0716	72.2285	2.45333	3.21333	335.36
2_15	-71.0536	-30.2579	1267	2022-01-10	17:44:00	late_afternoon	partial	bush	sandy	no	dirt	100	21.5882	50	8.79412	689.353	363.353	0.0576471	5547.41	177.278	86560	205	21.114	98.3994	2.4	2.92	334.867	Not the same as 1_15
2_17	-70.9772	-30.3603	708	2022-01-11	12:18:00	noon	partial	bush_cactus	sandy	no	dirt	30	28.2176	37.8824	9.28824	734.882	1033.82	0.401765	5138.6	153.462	64319.4	162	47.1121	200.376	3.34667	3.89333	375.68
2_19	-71.0197	-30.3619	756	2022-01-04	14:23:00	afternoon	clean	scarce_bush	stony	no	paved	150	30.4188	32.875	13.3	727.519	1052.88	0.359375	4274.65	151.304	91348.8	845	40.7988	154.585	1.74667	2.26667	379.573
2_20	-71.0533	-30.2161	1016	2022-01-10	13:55:00	afternoon	partial	bush	sandy	no	paved	200	21.1353	54.0588	22.7824	709.429	1057.47	0.397059	3711.2	713.132	23402.8	256	14.7616	27.2362	1.89333	2.4	330.093	Not the same as 1_20
2_21	-71.0354	-30.1848	1262	2022-01-10	11:16:00	noon	clean	bush	sandy	no	dirt	15	20.0353	54.0588	5.92941	689.212	1034.76	0.370588	4488.06	143.988	81865.9	261	21.9781	223.479	2.19048	2.58333	344.869
2_22	-71.0483	-30.1593	1132	2022-01-10	08:49:00	morning	partial	bush	sandy	no	dirt	12	17.3235	63.1765	6.22941	701.088	549.059	0.106471	4419.83	132.132	99434.4	997	22.4234	106.558	2.92	3.30667	329.907
2_23	-71.0562	-30.1433	1091	2022-01-08	17:30:00	late_afternoon	clean	bush	loamy	no	dirt	12	22.0412	49.2353	16.8529	701.694	474.353	0.0829412	12514.3	140.632	89997.2	507	20.1446	133.6	3.77333	4.33333	330.307
2_24	-71.0298	-30.1215	877	2022-01-08	14:26:00	afternoon	clean	bush_cactus	loamy	no	dirt	12	24.7353	48.6471	13.2765	720.059	1064	0.356471	3021.58	160.626	91643.7	730	31.2984	131.493	NA	NA	NA
2_25	-70.9939	-30.0504	328	2022-01-08	11:43:00	noon	clean	bush_cactus	loamy	no	dirt	8	20.9529	61.6471	11.5765	766.235	1091.24	0.361765	11694.2	132.002	60757.9	183	29.1093	101.882	6.93333	7.8	365.173	Not the same as 1_25
2_26	-71.0237	-30.0298	395	2022-01-08	08:58:00	morning	cloudy	scarce_bush	sandy	no	dirt	60	15.8412	78.1176	3.48235	759.2	380.353	0.0858824	9513.9	167.949	100304	123	19.0851	68.3245	6.85333	7.44	347.893	Not the same as 1_26
2_27	-71.0568	-30.2717	504	2022-01-06	09:14:00	morning	partial	bush	sandy	no	paved	7	15.7294	76.4706	5.66471	752.1	671.471	0.152941	7926.37	253.065	81263.2	143	17.5338	125.087	6.81333	7.84	367.52
2_28	-71.0991	-30.2856	1171	2022-01-05	12:22:00	noon	clean	bush	stony	no	paved	6	23.6353	47.2941	20.2412	694.624	1165.94	0.427059	2723.34	173.232	59860.7	119	18.2596	59.4609	1.37333	2.05333	339.6
2_29	-71.0496	-30.3378	1051	2022-01-04	17:00:00	late_afternoon	clean	bush	sandy	no	paved	200	26.0353	41.4706	19.6765	702.612	581.118	0.120588	2213.65	569.504	44187.6	286	41.9326	190.745	2.72	3.41333	356.947
2_30	-70.9832	-30.4248	618	2022-01-12	09:00:00	morning	partial	cactus	stony	no	dirt	10	21.3882	59.5294	6.21176	742.765	629.706	0.118824	6828.09	133.624	66745.7	146	116.921	30.1938	3.92	4.26667	350.453
2_31	-71.1481	-30.4297	495	2022-01-09	09:25:00	morning	partial	bush	sandy	no	dirt	300	19.5176	61.2941	5.74706	755.206	773	0.169412	15110.6	451.331	99033.8	77	146.988	20.3171	3.34667	3.84	386.667	Not the same as 1_31
2_32	-71.1404	-30.3858	582	2022-01-09	11:56:00	noon	partial	bush_cactus	sandy	no	dirt	20	23.1588	50.4118	12.3353	746.618	900.059	0.347059	7501.57	254.831	94980.6	79	128.306	20.9884	NA	NA	NA	Not the same as 1_32
2_33	-71.1651	-30.3199	711	2022-01-09	14:24:00	afternoon	partial	bush	loamy	no	dirt	35	24.925	44.9375	11.175	734.213	1089.88	0.373125	22015.9	380.925	86053.7	124	278.703	18.7037	NA	NA	NA
2_34	-71.1761	-30.3026	799	2022-01-09	16:55:00	late_afternoon	partial	bush_cactus	sandy	no	dirt	8	23.2176	48.7647	19.8647	726.329	623.647	0.138824	7505.3	172.543	87984.5	146	239.468	16.7314	NA	NA	NA
2_35	-71.1771	-30.28	718	2022-01-05	09:22:00	morning	clean	bush_cactus	sandy	no	dirt	10	24.4882	42.1765	3.67059	731.288	762.706	0.174706	4608.26	124.64	122967	99	180.013	18.3235	0.813333	1.29333	374.187
2_36	-71.0775	-30.1038	753	2022-01-06	11:34:00	noon	clean	bush	sandy	no	paved	5	21.8647	56.1176	7.53529	729.588	1102.59	0.365294	11440.4	509.309	66937.7	104	131.033	38.3415	5.45333	6.41333	363.96
2_37	-71.1121	-30.1086	906	2022-01-06	13:57:00	afternoon	clean	bush	sandy	yes	paved	5	24.5824	48.7647	9.47059	716.282	1110.47	0.387647	9162.63	301.502	91591.8	349	81.4483	9.79829	5.02667	5.86667	365.4
2_38	-71.1791	-30.1241	345	2022-01-06	16:45:00	late_afternoon	clean	bush_cactus	loamy	no	dirt	3	22.95	55.3125	11.2	761.238	692.25	0.140625	6565.45	175.224	56765.8	176	206.933	57.653	9.88	16.32	375.52
AVERAGE			852.143										21.1607	45.3951	11.1717	722.935	783.184	0.210604	6904.1	212.661	75842.7	291.855	42.9668	119.215	3.88918	4.64776	366.696
SD			294.979										5.17211	16.1283	5.04752	24.6876	251.946	0.114488	4174.8	143.461	18116.8	235.417	55.8532	79.891	3.30288	3.83624	27.0961
